## 1 **ABSTRACT**

2 Tuberculosis, one of the oldest recorded human afflictions, is still one of the biggest killers  
3 among the infectious diseases, despite the worldwide use of a live attenuated vaccine and  
4 several antibiotics. This study was designed to assess the resistance rate distribution of MDR-  
5 TB among pulmonary tuberculosis patients attending Nnamdi Azikiewe University Teaching  
6 Hospital (NAUTH) Nnewi and St Patrick's Hospital Mile 4 Abakaliki in the Southeast  
7 Nigeria. Patients with persistent cough for over two weeks were screened by Ziehl-Neelsen  
8 (ZN) technique for the presence of acid fast bacilli (AFB) in their sputum and a total of 103  
9 patients with AFB positive sputum samples were recruited. The positive sputum samples  
10 were subjected to Xpert MTB/RIF assay (GeneXpert®, Cepheid USA) and culture on  
11 Lowenstein Jensen medium for 42days at 37<sup>0</sup>C. Drug susceptibility testing was done on the  
12 isolates using the nitrate reduction assay (NRA). Xpert MTB/RIF assay detected MTB in  
13 83(80.6%) samples out of which 45(67.2%) were rifampicin resistant. Sixty-seven (80.7%) of  
14 the isolates were resistant to at least one of the first-line drugs. Primary resistance was 91%  
15 while 19.4%, 35.8%, 22.4% and 22.4% of the isolates were resistant to one, two, three and  
16 four drugs respectively. Isoniazid had the highest rate of resistance (57.8%) while Ethambutol  
17 had the least (34.9%) and 30(44.8%) of the resistant isolates were MDR. Smoking (P=.002),  
18 gender (P=.002) and history of TB treatment (P=.012) were significantly associated with drug  
19 resistance. Educational status was significantly associated with MDR-TB (P=.020). NAUTH  
20 and St Patrick's hospital had MDR-TB rates of 38.9% and 46.9% respectively. The findings  
21 of this study indicate high prevalence of MDR-TB among patients with pulmonary TB in the  
22 study sites and this portrays a menace to adequate TB control. Prompt diagnosis of TB,  
23 adequate patient compliance to therapy and increased awareness and mass education is  
24 recommended

25

26 **Keywords:** Resistance, MDR-TB, Tuberculosis, Patient

27 **INTRODUCTION**

28 The discovery of anti-tuberculosis drugs in the 1940s followed by combination chemotherapy  
29 made tuberculosis a curable disease. In the developed countries, effective treatment and  
30 surveillance reduced tuberculosis dramatically with high hopes of total eradication [1, 2].  
31 However, in the 1980s, it was realized that tuberculosis had not only ceased to decline in the  
32 developed countries, notably the USA, but was actually increasing, particularly in major  
33 cities [2]. It was also soon realized that the disease was out of control and increasing at an  
34 alarming rate across most of the poorest regions of the world especially Africa due to  
35 HIV/AIDS [1, 3]. Despite aggressive international efforts, tuberculosis remains a leading  
36 infectious cause of death, with an estimated 8.6 million incident cases per year. In 2012, an  
37 estimated 1.3 million people died from the disease. These death rates, however, only partially  
38 depict the global TB threat; more than 80% of TB patients are in the economically productive  
39 age of 15 to 49 years [4].

40

41 Interestingly, global tuberculosis control efforts have been threatened by the emergence of  
42 multidrug resistant tuberculosis (MDR-TB). It is the strains of *Mycobacterium tuberculosis*  
43 which show high level resistance to both isoniazid and rifampicin, with or without resistance  
44 to other anti TB drugs [4]. Alarmingly, MDR-TB is estimated to cause 4% of new  
45 tuberculosis cases in the developing world. Patients infected with MDR strains are not only  
46 difficult to cure but also more likely to remain sources of infection for a longer period of time  
47 than those with drug susceptible organisms. MDR-TB requires longer duration of treatment  
48 (up to 2 years) to achieve cure, in comparison with 6 month treatment for drug susceptible

49 TB, lower cure rates and even higher default rates, not minding the expensive cost of  
50 treatment [5].

51

52 Remarkably, due to the increasing prevalence, MDR-TB is now subdivided into basic MDR-  
53 TB, with resistance only to rifampicin and isoniazid, and extensive drug resistant TB (XDR-  
54 TB), with a similar resistance pattern but with resistance to one or more additional first and/or  
55 second line drugs. Various perturbations in the individual drug target genes are responsible  
56 for the genesis of anti-TB drugs resistance. Rifampicin resistance has been shown to be  
57 caused by a change in the  $\beta$ -subunit of DNA dependent RNA polymerase, which is encoded  
58 by the *rpo $\beta$*  gene and more than 95% of rifampicin resistant strains are associated with  
59 mutations within an 81-base pair region of the *rpo $\beta$*  gene, which is termed rifampicin  
60 resistance determinant region [6, 7, 8]. On the contrary, resistance to isoniazid is due to  
61 mutations at one of two main sites, in either the *katG* or *inhA* genes [9, 10]. It is also noted  
62 that these mutations are not directly connected, and so separate mutations are required for  
63 organisms to change from a drug susceptible isolate to MDR-TB. Furthermore, rifampicin  
64 resistance has been considered to be a surrogate marker for checking multidrug resistance in  
65 clinical isolates of *M. tuberculosis* since rifampicin resistance is often accompanied by  
66 resistance to isoniazid [7, 8]. Drug resistance in *M. tuberculosis* occurs by random, single  
67 step, spontaneous mutation at a low but predictable frequency, in large bacterial populations.  
68 The accurate diagnosis of MDR-TB requires a positive culture of *M. tuberculosis* and drug  
69 susceptibility testing. The use of genotypic analysis of *rpo $\beta$*  for Rif resistance in evaluating  
70 the public health threat of *Mycobacterium tuberculosis* is controversial due to the fact that  
71 misdiagnosing of patients as MDR-TB when they are only Rif mono-resistant would lead to  
72 inappropriate second line treatment in a world of limited second line armamentarium [11].

73

74 Due to the burden in diagnosing MDR-TB in pulmonary tuberculosis patients resulting from  
75 poor facilities in Nigeria, this study therefore assessed the resistance rate distribution of  
76 MDR-TB among pulmonary tuberculosis patients attending Nnamdi Azikiewe University  
77 Teaching Hospital Nnewi and St Patrick's Hospital Mile 4 Abakaliki in the Southeast  
78 Nigeria.

79

## 80 **MATERIALS AND METHODS**

### 81 **Study Area**

82 This study was conducted at Nnamdi Azikiwe University Teaching Hospital (NAUTH),  
83 Nnewi and St Patrick's Hospital, Mile 4 Abakaliki. Nnewi is the second largest city in  
84 Anambra State and is home to nearly 388,805 residents. Abakaliki is the capital of Ebonyi  
85 state and has a population of 149,683 persons [12]. NAUTH is a tertiary health institution and  
86 serves as a site for treatment and management of both TB and HIV patients. It is also a  
87 referral centre for both cases. St Patrick's Hospital, Mile 4 Abakaliki is a faith-based health  
88 facility and offers both antiretroviral therapy and TB care to patients.

### 89 **Sample Size**

90 Minimum sample size was calculated using the formula stated by [13] and a total of 103  
91 sputum smear positive AFB samples were collected for the study.

### 92 **Ethical Approval**

93 Ethical approval for this study was obtained from NAUTH research and ethics committee.  
94 Consent was obtained from each participant and participants' confidentiality was maintained  
95 throughout the study. Participants received no financial motivation for their involvement in

96 the study. Participants were free to withdraw from the study at any point and their withdrawal  
97 would not affect their treatment. This study was conducted between January 2015 and  
98 September 2016

### 99 **Sample collection and analysis**

100 About 2mls of venous blood sample from smear positive AFB participants' was collected in  
101 plain tube, allowed to clot and the serum separated and screened for presence of HIV-1/2  
102 antibodies using serial algorithm method. Determine®, Unigold® and Stat-pak® HIV test  
103 kits were used according to manufacturer's instruction (Determine® is manufactured by Alere  
104 Medical Co., Ltd Japan while Unigold® and StatPak® are manufactured by Trinity Biotech  
105 PLC, Ireland and CHEMBIO Diagnostic Systems Inc New York, USA respectively) [14].

106 Consenting, eligible participants were screened for presence of AFB in their sputum. Two  
107 sputum samples (spot and early morning) were collected in sterile screw-cap universal  
108 containers from each participant on 2 consecutive days and stained by Ziehl-Neelsen's  
109 method.

110 Progressively, early morning mucoid or mucopurulent sputum specimen was collected from  
111 each participant with smear positive AFB test result into a sterile screw-cap universal bottle.  
112 The specimen was then stored in the refrigerator until transported to the TB reference  
113 laboratory of Dr Lawrence Henshaw Memorial Hospital (DLHMH) in Calabar, Cross River  
114 State. Transport was done within 72hrs of collection.

115 After appropriate sample preparation, two Lowenstein Jensen (LJ) medium slants were  
116 cultured for each sample. Tubes were loosely capped and incubated as such at 37°C for one  
117 week in a slanted position to ensure even distribution and absorption of inoculum. After 1  
118 week, tubes were incubated upright for up to 6 weeks and the caps tightened. An in-house

119 strain H37RV and an uninoculated tube were used as positive and negative control  
120 respectively as previously reported by [15].

121 After Colonies was confirmed by Ziehl-Neelsen (ZN) staining for acid-fastness, niacin test  
122 was carried out on each inoculated and control tubes. The formation of a yellow colour was  
123 interpreted as positive reaction; absence of colour was regarded as negative reaction for  
124 production of Niacin. Catalase test, p-Nitrobenzoic Acid (PNB) and TB Ag MPT64 Rapid  
125 Test was carried out in this study and *M. tuberculosis* identification was based on its slow  
126 growth rate, no pigmentation, no growth on Lowenstein Jensen (LJ) medium containing p-  
127 nitrobenzoic acid, niacin production, catalase negative at 68°C and positive Ag MPT 64 test.

128 Drug susceptibility testing (DST) was carried out on all confirmed *M. tuberculosis* colonies  
129 and nitrate reduction assay (NRA) method was used [16].

130 GeneXpert MTB/RIF assay for detection of Rifampicin Resistance was carried out on the  
131 sputum samples of the participants. Sputum sediments were mixed with sample buffer in a  
132 ratio of 1:3 in a screw cap tube and screwed tightly. The tube was vortexed for 20 seconds.  
133 Sample was incubated at room temperature for 10mins. After 10mins the sample was  
134 vortexed again for 20 seconds and incubated at room temperature for 5mins. After  
135 incubation, 2ml of sample was inoculated into the genexpert cartridge. Cartridge was scanned  
136 into the GeneXpert machine (Cepheid USA) and allowed to run for 2hrs. After 2hrs the test  
137 result was read off the screen of the GeneXpert machine monitor.

### 138 **Data Analysis**

139 Data was statistically analyzed using statistical package for social sciences SSPS for windows  
140 version 20.0 software. A standard questionnaire was completed for each recruited patient to  
141 collect demographic parameters. Frequencies were calculated as percentages. Comparison of

142 categorical variables and significance testing was done with  $\chi^2$  test. P-value of less than  
143 0.05(P<0.05) was considered statistical significant.

144



145 **RESULTS**

146 Out of the 103 AFB positive sputum samples collected 83(80.6%) showed culture positive  
147 isolates. Sixty-one (61) of the isolates were from St Patrick’s Hospital, Mile 4 Abakaliki  
148 while 30 were from NAUTH giving a TB prevalence rate of 73.50% and 26.50%  
149 respectively. Fig 2 showed 80.70% resistance rate of the isolates. NAUTH had resistance rate  
150 of 81.80% compared with 80.70% from Mile 4 Abakaliki.

151

152

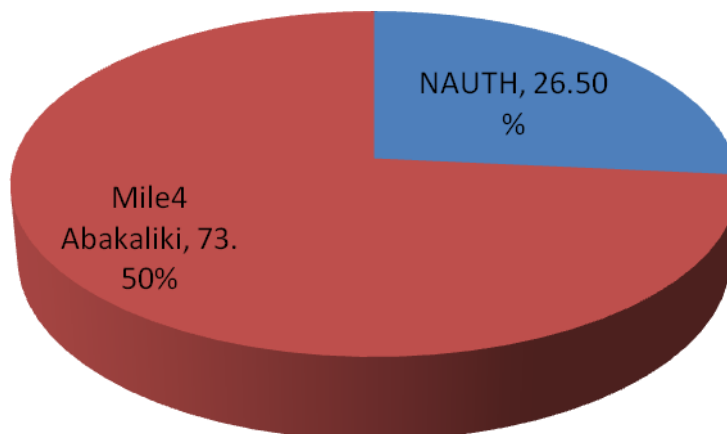

153

154

155 **Fig 1: Culture Positivity based on Site**

156

157

158

159

160

161

162

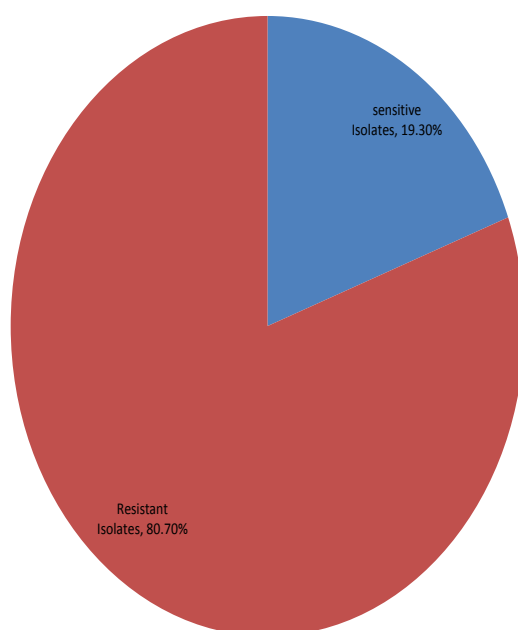

163

164

165 **Fig 2: Resistance Rate of Isolates in the Study**

166

167

168

169

170  
171  
172  
173  
174

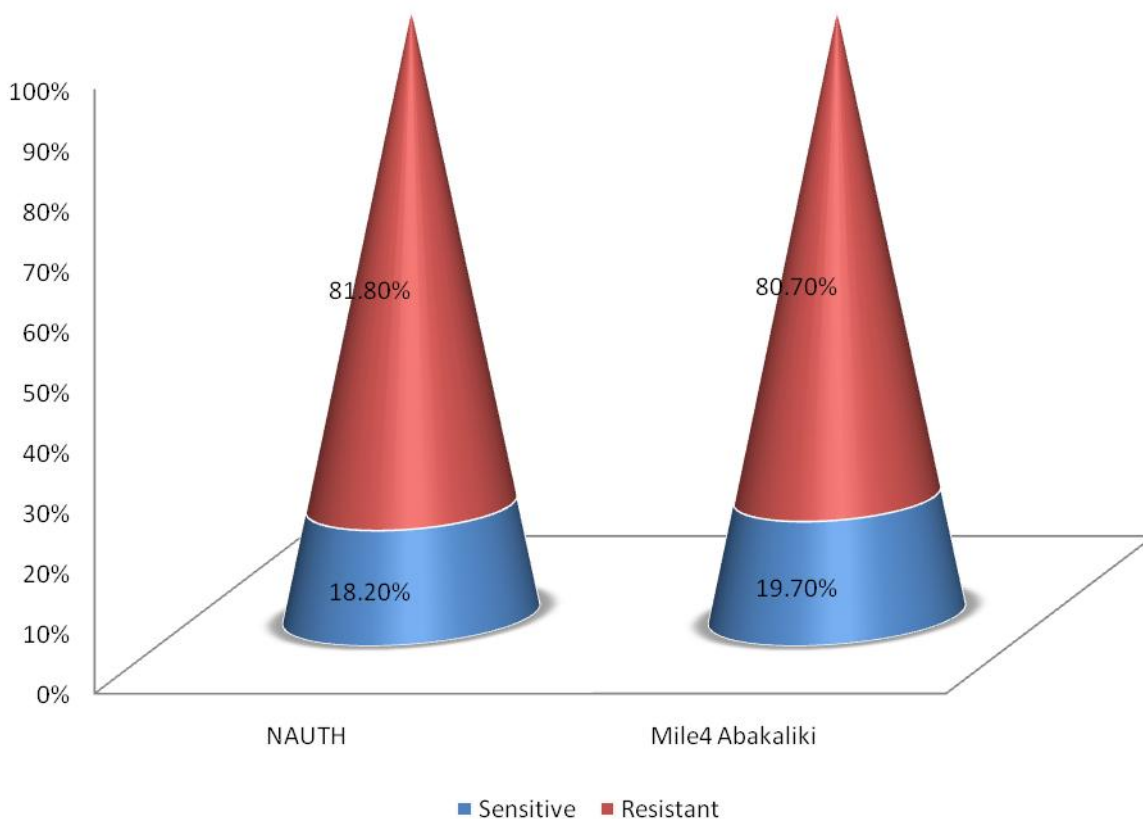

175  
176 **Fig 3: Resistance Rate of Isolates based on Site**

177 **Abbreviations**

178 **NAUTH:** Nnamdi Azikiwe University Teaching Hospital

179  
180  
181  
182  
183

184

185

186

187

188 Table 1 showed no statistically significant difference among the age groups, though age  
189 group 18-25years and 26-35years showed high resistance rate of (91.3%) and (77.8%)  
190 respectively. Gender showed statistically significant association with resistance to first-line  
191 anti-TB drugs. Employment status, educational status, residence and marital status showed no  
192 significant difference. In table 2, history of smoking and previous TB treatment was found to  
193 be statistically significant for drug resistance.

194 **Table 1: Resistance Rates of Isolates with respect to Demographic Factors**

| <b>Variable</b>    | <b>Number</b>   | <b>Resistant</b> | <b>Resistant</b> | <b>P-value</b> |
|--------------------|-----------------|------------------|------------------|----------------|
|                    | <b>Culture</b>  | <b>Isolates</b>  | <b>rate (%)</b>  |                |
|                    | <b>Positive</b> |                  |                  |                |
| <b>Age (years)</b> |                 |                  |                  |                |
| 18-25              | 23              | 21               | 91.3             |                |
| 26-35              | 28              | 21               | 77.8             | .266           |
| 36-45              | 18              | 15               | 88.2             |                |
| 46-55              | 10              | 7                | 70.0             |                |
| 56-65              | 3               | 2                | 66.7             |                |
| >65                | 1               | 1                | 100              |                |
| <b>Gender</b>      |                 |                  |                  |                |

|      |    |    |      |      |
|------|----|----|------|------|
| Male | 49 | 34 | 69.4 | .002 |
|------|----|----|------|------|

|        |    |    |      |  |
|--------|----|----|------|--|
| Female | 34 | 33 | 97.1 |  |
|--------|----|----|------|--|

**Employment**

**Status**

|                |   |   |      |  |
|----------------|---|---|------|--|
| Civil servants | 7 | 5 | 71.4 |  |
|----------------|---|---|------|--|

|               |    |    |      |      |
|---------------|----|----|------|------|
| Self employed | 57 | 47 | 82.5 | .709 |
|---------------|----|----|------|------|

|         |    |    |      |  |
|---------|----|----|------|--|
| Student | 13 | 11 | 84.6 |  |
|---------|----|----|------|--|

|            |   |   |      |  |
|------------|---|---|------|--|
| Unemployed | 6 | 4 | 66.7 |  |
|------------|---|---|------|--|

**Educational Status**

|      |    |    |      |  |
|------|----|----|------|--|
| None | 11 | 10 | 90.9 |  |
|------|----|----|------|--|

|         |    |    |      |      |
|---------|----|----|------|------|
| Primary | 26 | 20 | 76.9 | .600 |
|---------|----|----|------|------|

|           |    |    |      |  |
|-----------|----|----|------|--|
| Secondary | 36 | 30 | 83.3 |  |
|-----------|----|----|------|--|

|          |    |   |      |  |
|----------|----|---|------|--|
| Tertiary | 10 | 7 | 70.0 |  |
|----------|----|---|------|--|

**Location/Residence**

|       |    |    |      |      |
|-------|----|----|------|------|
| Rural | 52 | 41 | 78.8 | .830 |
|-------|----|----|------|------|

|            |   |   |      |  |
|------------|---|---|------|--|
| Semi-urban | 5 | 4 | 80.0 |  |
|------------|---|---|------|--|

|       |    |    |      |  |
|-------|----|----|------|--|
| Urban | 26 | 22 | 84.6 |  |
|-------|----|----|------|--|

**Marital Status**

|         |    |    |      |      |
|---------|----|----|------|------|
| Married | 53 | 43 | 81.0 | .900 |
|---------|----|----|------|------|

|               |    |    |      |
|---------------|----|----|------|
| Single        | 30 | 24 | 80.0 |
| Widow/Widower | 0  | 0  | 0    |

195 **Table 2: Assessment of Some Risk Factors with respect to Drug Resistance**

| <b>Risk Factor</b>                         | <b>Number</b>   | <b>Resistant</b> | <b>Resistant rate</b> | <b>P-value</b> |
|--------------------------------------------|-----------------|------------------|-----------------------|----------------|
|                                            | <b>Culture</b>  | <b>Isolates</b>  | <b>(%)</b>            |                |
|                                            | <b>Positive</b> |                  |                       |                |
| <b>History of Smoking</b>                  |                 |                  |                       |                |
| Yes                                        | 21              | 12               | 57.1                  | 0.002          |
| No                                         | 62              | 55               | 88.7                  |                |
| <b>Hist. of Alcoholism</b>                 |                 |                  |                       |                |
| Yes                                        | 48              | 37               | 77.1                  | 0.325          |
| No                                         | 35              | 30               | 85.7                  |                |
| <b>Ever lived in a crowded environment</b> |                 |                  |                       |                |
| Yes                                        | 31              | 22               | 71.0                  | 0.082          |
| No                                         | 52              | 45               | 86.5                  |                |
| <b>Previous TB contact</b>                 |                 |                  |                       |                |
| Yes                                        | 16              | 14               | 87.5                  | 0.059          |

|    |    |    |      |
|----|----|----|------|
| No | 67 | 53 | 79.1 |
|----|----|----|------|

**Prev. TB treatment**

|     |    |    |      |       |
|-----|----|----|------|-------|
| Yes | 8  | 6  | 75.0 | 0.012 |
| No  | 75 | 61 | 81.3 |       |

**HIV Status**

|          |    |    |      |       |
|----------|----|----|------|-------|
| Positive | 10 | 6  | 60.0 | 0.076 |
| Negative | 73 | 61 | 83.6 |       |

196

197

198

199

200

201

202

203

204

205

206

207

208

209

210

211

212

213

214

215

216

217 Fig 4 showed primary and acquired resistance rate prevalence of the study. It shows also that  
218 primary resistance (91%) were higher than the acquired resistance (9%). Fig 5 showed the  
219 degree of the resistance of the isolate to first line anti-TB drugs 19.4%, 35.8%, 22.4% and  
220 22.4% of the isolates were resistant to one, two, three and four drugs respectively. In fig 6,  
221 isoniazid (57.80%) showed the highest resistance rate followed by rifampicin (54.20%),  
222 streptomycin (53.00%) and least by ethambutol (34%).



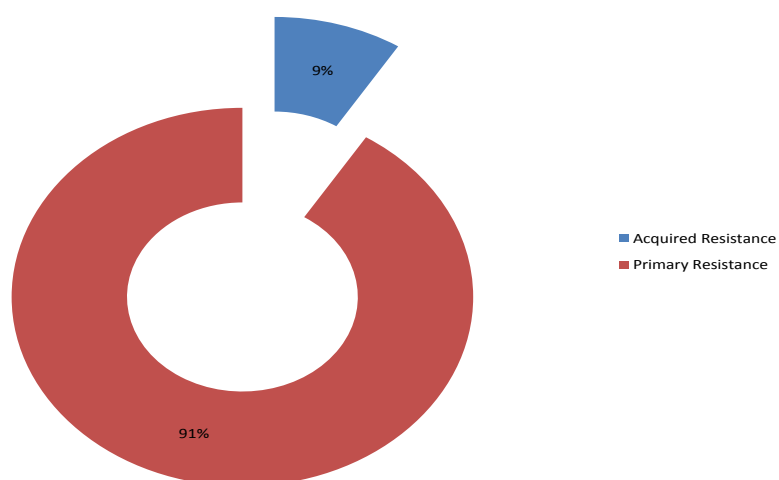

223  
224 **Fig 4: Rate of primary (treatment naïve) resistance in the study**

225

226

227

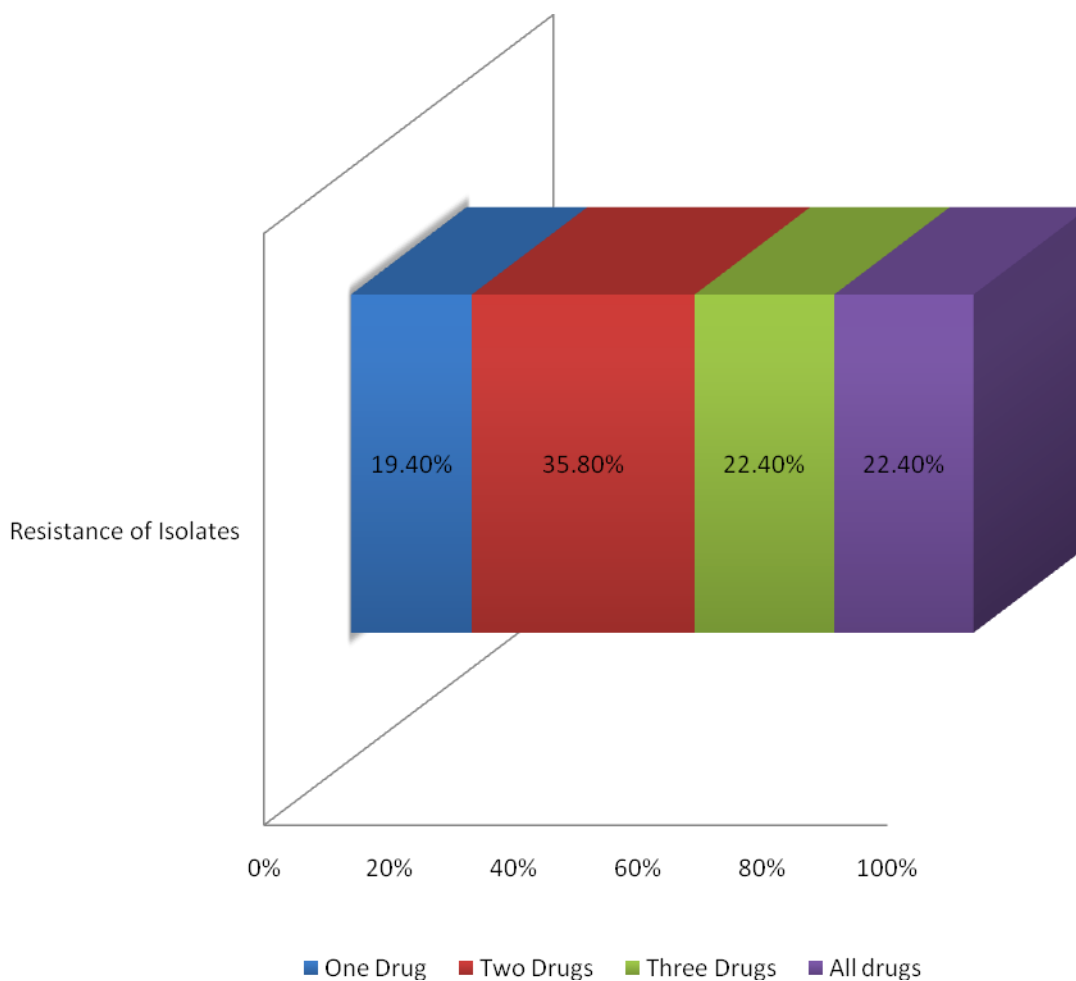

228  
229

**Fig 5: Degree of Resistance of Isolates to First-line Anti-TB Drugs**

230

231

232

233

234

235

236

237

238

239

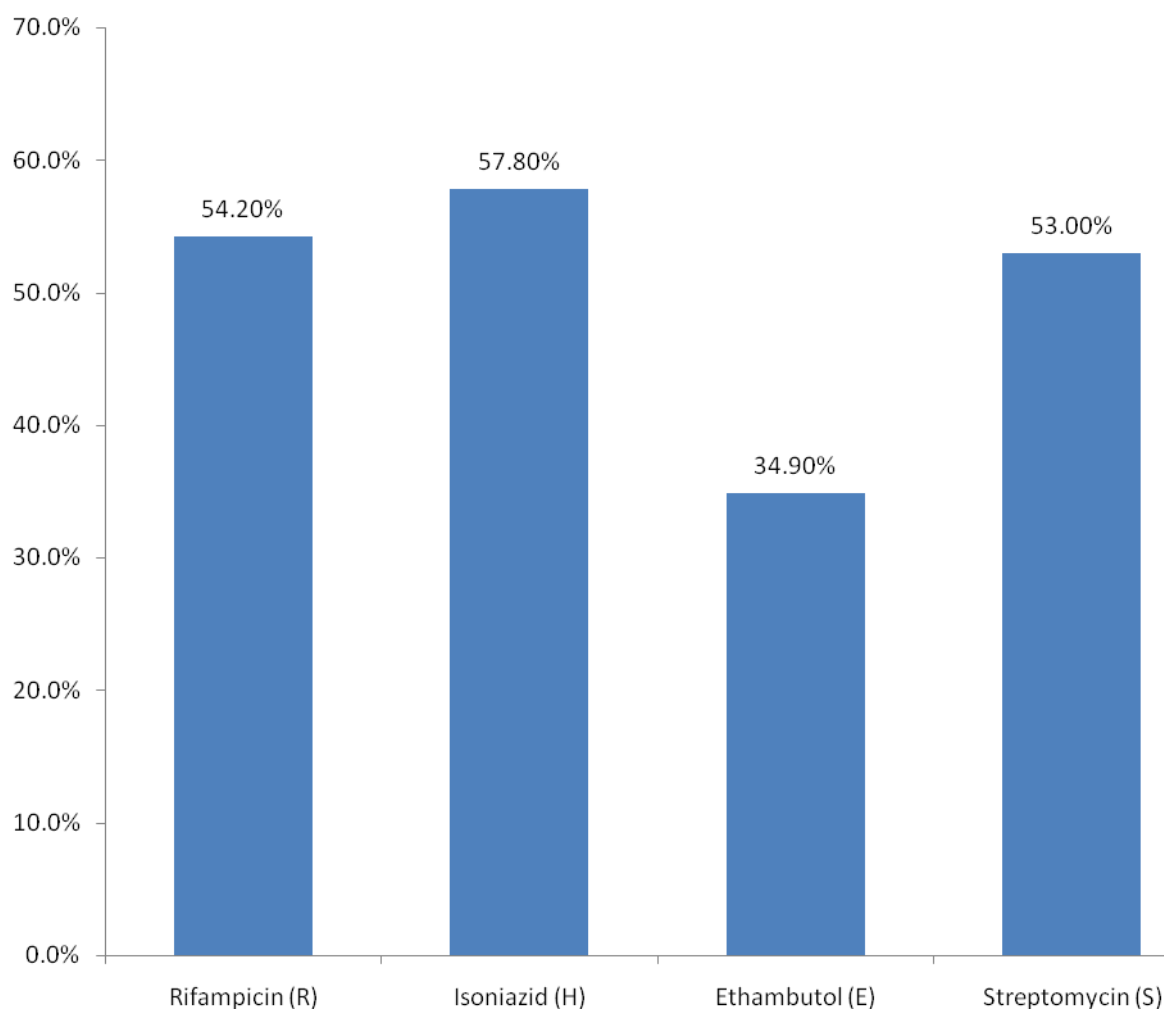

240  
241

242 **Fig 6: Resistance rate of isolates to individual first-line Anti-TB Drugs**

243

244

245

246

247

248

249 In table 3, isolates of *M. tuberculosis* exhibited fourteen resistance patterns to the first-line  
250 anti-TB drugs with the combination of Streptomycin, Isoniazid, Rifampicin and Ethambutol  
251 showing the highest resistance rate (22.4%). However based on site, table 4 showed that  
252 isolates from NAUTH exhibited eleven (11) distinct resistance patterns while isolates from  
253 Mile 4 Hospital, table 5, exhibited fourteen (14) patterns. Table 6, showed resistance pattern  
254 of isolates with respect to treatment history, treatment Naïve (primary treatment) exhibited  
255 higher resistance pattern when compared with retreatment. Fig 7 showed high Prevalence of  
256 **MDR-TB** (37.50%) with respect to treatment history than retreatment (36.00%).

257 **Table 3: Pattern of Resistance of Isolates to First-line Anti-TB Drugs**

| <b>Drug Pattern</b>                         | <b>No. of Isolates Resistant (%)</b> |
|---------------------------------------------|--------------------------------------|
| <b>Rifampicin only</b>                      | 1 (1.5)                              |
| <b>Ethambutol only</b>                      | 1 (1.5)                              |
| <b>Isoniazid only</b>                       | 8 (11.9)                             |
| <b>Streptomycin only</b>                    | 3 (4.5)                              |
| <b>Rifampicin and Ethambutol</b>            | 2 (3.0)                              |
| <b>Rifampicin and Streptomycin</b>          | 9 (13.4)                             |
| <b>Isoniazid and Ethambutol</b>             | 4 (6.0)                              |
| <b>Isoniazid and Streptomycin</b>           | 4 (6.0)                              |
| <b>Isoniazid and Rifampicin</b>             | 5 (7.5)                              |
| <b>Rifampicin, Isoniazid and Ethambutol</b> | 2 (3.0)                              |

**Streptomycin, Isoniazid and Rifampicin** 8 (11.9)

**Streptomycin, Rifampicin and** 3 (4.5)

**Ethambutol**

**Streptomycin, Isoniazid and Ethambutol** 2 (3.0)

**Streptomycin, Isoniazid, Rifampicin and** 15(22.4)

**Ethambutol**

258

259

260

261

262

263

264

265

266

267

268

269

270

271 **Table 4: Resistant Pattern of Isolates from NAUTH**

| <b>Drug Pattern</b>                                       | <b>Number of Isolates</b> |
|-----------------------------------------------------------|---------------------------|
| <b>Isoniazid only</b>                                     | 3                         |
| <b>Streptomycin only</b>                                  | 2                         |
| <b>Isoniazid and Ethambutol</b>                           | 3                         |
| <b>Isoniazid and Rifampicin</b>                           | 1                         |
| <b>Streptomycin and Isoniazid</b>                         | 1                         |
| <b>Streptomycin and Rifampicin</b>                        | 1                         |
| <b>Isoniazid, Rifampicin and Ethambutol</b>               | 1                         |
| <b>Streptomycin, Isoniazid and Rifampicin</b>             | 3                         |
| <b>Streptomycin, Rifampicin and Ethambutol</b>            | 1                         |
| <b>Streptomycin, Isoniazid and Ethambutol</b>             | 1                         |
| <b>Streptomycin, Isoniazid, Rifampicin and Ethambutol</b> | 1                         |

272

273

274

275

276

277 **Table 5: Resistant Pattern of Isolates from Mile 4 Hospital Abakaliki**

| <b>Drug Pattern</b>                                       | <b>No. of Isolates Resistant</b> |
|-----------------------------------------------------------|----------------------------------|
| <b>Rifampicin only</b>                                    | 1                                |
| <b>Ethambutol only</b>                                    | 1                                |
| <b>Isoniazid only</b>                                     | 5                                |
| <b>Streptomycin only</b>                                  | 1                                |
| <b>Rifampicin and Ethambutol</b>                          | 2                                |
| <b>Rifampicin and Streptomycin</b>                        | 8                                |
| <b>Isoniazid and Ethambutol</b>                           | 1                                |
| <b>Isoniazid and Streptomycin</b>                         | 3                                |
| <b>Isoniazid and Rifampicin</b>                           | 4                                |
| <b>Rifampicin, Isoniazid and Ethambutol</b>               | 1                                |
| <b>Streptomycin, Isoniazid and Rifampicin</b>             | 5                                |
| <b>Strptomycin, Rifampicin and Ethambutol</b>             | 2                                |
| <b>Streptomycin, Isoniazid and Ethambutol</b>             | 1                                |
| <b>Streptomycin, Isoniazid, Rifampicin and Ethambutol</b> | 14                               |

278

279

280 **Table 6: Resistance pattern of Isolates with respect to Treatment History**

| <b>Drug Pattern</b>                                       | <b>No. of Resistant Isolates</b> |                    |
|-----------------------------------------------------------|----------------------------------|--------------------|
|                                                           | <b>Treatment Naive</b>           | <b>Retreatment</b> |
| <b>Rifampicin only</b>                                    | 1                                | 0                  |
| <b>Ethambutol only</b>                                    | 1                                | 0                  |
| <b>Isoniazid only</b>                                     | 8                                | 0                  |
| <b>Streptomycin only</b>                                  | 3                                | 0                  |
| <b>Rifampicin and Ethambutol</b>                          | 1                                | 1                  |
| <b>Rifampicin and Streptomycin</b>                        | 9                                | 0                  |
| <b>Isoniazid and Ethambutol</b>                           | 4                                | 0                  |
| <b>Isoniazid and Streptomycin</b>                         | 2                                | 2                  |
| <b>Isoniazid and Rifampicin</b>                           | 4                                | 1                  |
| <b>Rifampicin, Isoniazid and Ethambutol</b>               | 1                                | 1                  |
| <b>Streptomycin, Isoniazid and Rifampicin</b>             | 7                                | 1                  |
| <b>Strptomycin, Rifampicin and Ethambutol</b>             | 3                                | 0                  |
| <b>Streptomycin, Isoniazid and Ethambutol</b>             | 2                                | 0                  |
| <b>Streptomycin, Isoniazid, Rifampicin and Ethambutol</b> | 15                               | 0                  |

281

282



283

284

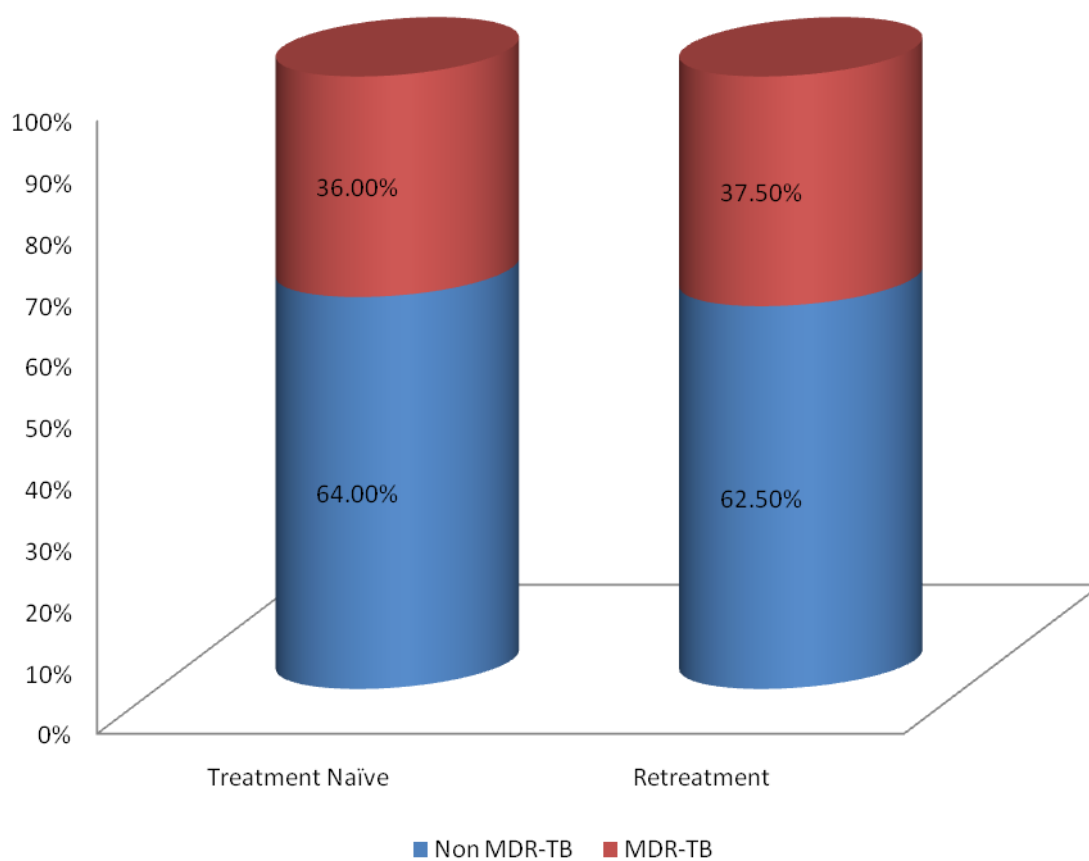

285

286 **Fig 7: Prevalence of MDR-TB with respect to Treatment History**

287 **Abbreviations**

288 **Non MDR-TB: Non multidrug resistance Tuberculosis**

289 **MDR-TB: Multidrug resistance Tuberculosis**

290

291

292

## 293 DISCUSSION

294 Tuberculosis remains the major global health problem which ranked the 9th leading cause of  
295 death worldwide and currently, the emergency of MDR-TB is also the main public health  
296 problem in both developing and developed countries [17]. Drug resistance in *M. tuberculosis*  
297 isolates arises from spontaneous genetic mutations and can be enhanced by poor adherence of  
298 patients to anti-TB drugs [18]. Moreover, infection depends both on the bacterial virulence  
299 and the inherent microbicidal ability of the alveolar macrophage that ingests it. If the bacillus  
300 is able to survive initial defences, it can multiply within the alveolar macrophage [19].  
301 Interestingly, out of a total of 103 acid fast bacilli AFB positive samples in this study 83  
302 (80.6%) yielded *Mycobacterium tuberculosis* isolates on culture, 12(11.7%) were negative  
303 for *M. tuberculosis*, while 8(7.8%) were contaminated. Sixty-one (61) of the isolates were  
304 from St Patrick's Hospital, Mile 4 Abakaliki while 30 were from NAUTH giving a TB  
305 prevalence rate of 73.50% and 26.50% respectively. The high culture positivity rate in this  
306 study agrees with [20] that reported 65.7% culture positivity rate in South-West Nigeria. Also  
307 [21] reported that 100 out of 120 sputum samples were positive for *M. tuberculosis* on culture  
308 in a study in Calabar. In the contrary, this rate is higher than the 33% culture positivity rate  
309 reported by [15] in a study at Nnewi. Also [22] reported a lower rate of 44% in India.

310 Report has it that drug resistance is mainly due to irregular or improper anti-TB drug use and  
311 absence of good, effective national TB control programme which have led to accumulation  
312 and multiplication of resistance strains [23, 22]. The high resistance rate of isolates in this  
313 study is similarly high in consonance with [24]. They reported that 81.2% of their isolates  
314 showed resistance to at least one drug in Georgia. [20] Reported a resistance rate of 62.5% in  
315 South-West Nigeria. Also [22] reported 69.7% resistance rate in a study conducted in India.  
316 The resistance rate obtained in this study however is higher than the 31% resistance rate

317 reported by [25] in a study at Abuja and this could be due to geographical variations in drug  
318 resistance rates. Drug resistance rate obtained from NAUTH (81.80%) is higher than that  
319 reported by [15] that showed 46.1% resistance rate to at least one drug in a study conducted  
320 in Nnewi. This indicates an increasing trend in drug resistance which could be as a result of  
321 selective compliance to treatment and default among clients [23, 26]. However, since  
322 previous rate of drug resistance at St Patrick's Hospital could not be assessed, a comparison  
323 could not be made.

324 Among the socio-demographic factors assessed in this study, female gender was significantly  
325 associated with drug resistance. The resistance rate for the females was higher than that for  
326 the males. This agrees with a study conducted in Georgia which revealed that women were  
327 more at risk of drug resistance compared to men [27, 24]. The role of women as care givers  
328 predispose them to developing drug resistance as they have longer contact at home with sick  
329 relatives. Also because of cultural restrictions, women are educationally disadvantaged.  
330 Women due to ignorance may not fully understand the importance of adherence to therapy. In  
331 a study to access factors contributing to treatment adherence in Zambia, (39.1%) of the  
332 females compared with (33.9%) of the males stopped taking their medication after 2 months.  
333 Most of the male TB patients were older and more educated than the female TB patients [28].  
334 Gender as a significant demographic factor for drug resistance in this study agrees with the  
335 report of [23].

336 The significant association of smoking with drug resistance in this study has been  
337 collaborated in other studies. According to [29] smoking among other life style habits has  
338 been associated with development of drug resistance. This agrees with [30] who reported that  
339 poor treatment outcomes were higher in smokers in a study in Georgia. [31] Described an  
340 association between drug resistance and smoking or tobacco use in some cases of drug

341 resistant TB. It was explained that cigarette smoke contains mutagenic chemicals; and  
342 smoking and environmental pollutants could also alter the redox balance, in turn affecting the  
343 mutation rate. Significant association of a history of TB treatment in this study with drug  
344 resistance agrees with several published articles. [15] Reported that previous TB treatment  
345 was a risk factor for MDR-TB and [20] in a study in South-west Nigeria reported that the  
346 most significant factor associated with drug resistance was a history of previous anti-TB  
347 treatment. Also, [21] reported that previous TB treatment was significant for drug resistance.  
348 [22] In a study in Karnataka region, India, showed that past history of pulmonary TB was  
349 statistically associated with development of drug resistance. [32] Reported also that previous  
350 history of TB treatment among other risk factors was independently associated with high risk  
351 of resistance to any first-line anti-TB drug. Delayed recognition of drug resistance,  
352 inappropriate chemotherapy regimens, inadequate or irregular drug supply, poor compliance  
353 by patients, malabsorption of one or more drugs, and sequestered disease (in which  
354 differential penetration of anti TB drugs may lead to mono-therapy), have been reported as  
355 reasons for development of drug resistance in previously treated patients [26].

356 Primary drug resistance in this study was high and this is in conformity with [33] who  
357 reported resistance rate of (84.6%) in a study in Tanzania. Also [15] reported that a higher  
358 proportion of drug resistance was seen among new TB cases than among previously treated  
359 cases. [24] Also showed a primary drug resistance rate of (67.12%) in Georgia. However [34,  
360 22, 32], reported lower rates of 10.3%, 9.1% and 15.3% respectively in individual studies  
361 done in Uganda, India and Ethiopia respectively. Primary drug resistance occurs when drug  
362 resistant bacilli are transmitted to other people [21]. The high rate of primary drug resistance  
363 in this study indicates the high proportion of the population harbouring resistant strains.  
364 Studies have shown that transmission of drug resistant strains (i.e. primary drug resistance)

365 rather than amplification from susceptible strains (acquisition of resistance conferring  
366 mutations i.e. acquired resistance) is the dominant source of MDR-TB [35]. In addition, most  
367 of the first line anti-TB drugs are available without prescription (over the counter), and there  
368 are no effective control of the availability of these drugs outside the National TB control  
369 programme, some of these patients may have been treated with some of these first line anti-  
370 TB drugs unknowingly. Hence they are not frank cases of primary drug resistance.

371 Isolates in this study exhibited the highest resistance rate to Isoniazid, and the least to  
372 Ethambutol. [36] In a review of first-line anti-tuberculosis drug resistance reported that  
373 Isoniazid had the highest resistance in Iran, in over 16-year while Ethambutol had the least.  
374 [15] Showed that Isoniazid mono-resistance was highest among the first line anti-TB drugs  
375 and similar pattern of drug resistance was also observed by [32]. Isoniazid is one of the main  
376 drugs for TB treatment and over the years increasing levels of resistance to Isoniazid might  
377 be due to incomplete treatment [37, 36]. The increased prevalence of strains with primary  
378 resistance to Isoniazid is a very important indication to estimate the risk of development of  
379 MDR TB [26]. In the same vein, a high proportion of isolates in this study exhibited  
380 resistance to Rifampicin. Apprehensively, resistance to Rifampicin is the most pressing  
381 concern in the TB management because it necessitates very long, expensive and relatively  
382 toxic drug schedules and leads to poorer outcomes [35]. It has been shown that patients  
383 infected with strains resistant to Rifampicin will experience a higher failure rate with short  
384 course of 6 months chemotherapy [36]. Resistant isolates in this study exhibited distinct  
385 patterns of drug resistance. Varying patterns of drug resistance was shown by these isolates  
386 with respect to site and treatment history. In treatment of MDR-TB, the number of drugs in  
387 the regimen depends on the susceptibility pattern, availability of first line agents and extent of  
388 disease [38]. The pattern of drug resistance varies from place to place at different periods of

389 time therefore, knowledge of geographic variations is essential for monitoring of antibiotic  
390 resistance within a defined population of patients infected with *M. tuberculosis* [36].

391 From this study, it can be concluded that there is high prevalence of resistance to first line  
392 anti-TB drugs, with female gender, smoking and previous TB treatment being significantly  
393 associated with development of drug resistance. It was also observed that there is ongoing  
394 community transmission of drug resistance as shown by the high proportion of new cases  
395 showing drug resistance and that prevalence of MDR-TB is higher than that documented  
396 previously. Worthy of note is that primary transmission of MDR-TB is on the increase,  
397 therefore, there is need for more pro-active measures to tackle this public health menace.

#### 398 **ACKNOWLEDGEMENT**

399 We thank the entire staff of Dr Lawrence Henshaw Memorial Hospital (DLHMH) in Calabar,  
400 Cross River State for their assistance and for allowing us to make use of there reference  
401 laboratory. This research work received no specific grant from any funding agency in public,  
402 commercial, or non-for- profit sector.

#### 403 **REFERENCES**

- 404 1. Raviglione MC, Narain JP, Kochi A. 1992. HIV-associated tuberculosis in developing  
405 countries: clinical features, diagnosis, and treatment. *Bulletin of World Health Organization*  
406 **70**:515-526.
- 407 2. Raviglione MC, Snider DE Jr, Kochi A. 1995. Global epidemiology of tuberculosis;  
408 Morbidity and mortality of a worldwide epidemic. *J Amer Med Ass* **273**:220-226.
- 409 3. World Health Organization 2009. Global Tuberculosis Control: Epidemiology, Strategy  
410 and Financing. WHO Report 2009 pg. 7. Report number WHO/HTM/TB/2009.411.  
411 Available at: [http://www.who.int/tb/publications/global\\_report/2009/en/index.html](http://www.who.int/tb/publications/global_report/2009/en/index.html).

- 412 4. World Health Organization 2013. Global tuberculosis report 2013:  
413 [http://www.who.int/tb/publications/global\\_report/en/](http://www.who.int/tb/publications/global_report/en/)
- 414 5. Leimane V, Leimans J. 2006. Tuberculosis control in Latvia: integrated DOTS and DOTS-  
415 Plus programmes. *Eurosurveillance* **11**:1-3.
- 416 6. Telenti A, Imboden P, Marchesi F, Lowrie D, Cole S, Colston MJ, Matter L, Schopfer K,  
417 Bodmer T. 1993. Detection of rifampicin-resistance mutations in *Mycobacterium*  
418 *tuberculosis*. *Lancet* **341**:647-650.
- 419 7. Traore H, Fissette K, Bastian I, Devleeschouwer M, Portaels F. 2000. Detection of  
420 rifampicin resistance in *Mycobacterium tuberculosis* isolates from diverse countries by a  
421 commercial line probe assay as an initial indicator of multidrug resistance. *Inter J Tubercul*  
422 *and Lung Dis* **4**:481-489.
- 423 8. Sharma SK, Mohan A. 2006. Multidrug-resistant tuberculosis: A menace that threatens to  
424 destabilize tuberculosis control. *Chest* **130**:261-272.
- 425 9. Zhang Y, Heym B, Allen B, Young D, Cole ST. 1992. The catalase-eroxidase gene and  
426 isoniazid resistance of *Mycobacterium tuberculosis*. *Nature* **358**:591-593.
- 427 10. Piatek AS, Telenti A, Murray MR, El HH, Jacobs WJ, Kramer FR, Alland D. 2000.  
428 Genotypic analysis of *Mycobacterium tuberculosis* in two distinct populations using  
429 molecular beacons: implications for rapid susceptibility testing. *Anti Agents and Chemo*  
430 **44**:103-110.
- 431 11. Nwadioha SI, Nwokedi EOP, Ezema GC, Eronini NC, Anikwe A, Audu F, Onwuezobe I.  
432 2014 Drug resistant *Mycobacterium tuberculosis* in Benue, Nigeria. *B Micro Res J* **4**: 988-  
433 995

- 434 12. Federal Republic of .Nigeria Official Gazette. 2009. National Population Commission  
435 Abuja, Nigeria
- 436 13. Charan J, Biswas T. 2013. How to calculate sample size for different study designs in  
437 medical research. *Ind J Psychol Med* **35**: 121-126.
- 438 14. World Health Organization. 1999. Operational characteristics of commercially available  
439 assays to determine antibodies to HIV-1 and HIV-2 in human sera. (WHO/TB/99,1 Geneva)  
440 Report 11.  
441
- 442 15. Uzoewulu NG, Ibeh IN, Lawson L, Goyal M, Umenyonu N, Ofiaeli RO, Okonkwo R.  
443 2014. Drug resistant *Mycobacterium tuberculosis* in tertiary hospital southeast, Nigeria. *J Mel*  
444 *Micro and Diagn* **3**:141-148.
- 445 16. Manual on Technical SOPs for TB Labs. 2012. Nigeria Federal Ministry of Health,  
446 Department of Public Health Abuja.
- 447 17. World Health Organization. Global tuberculosis report. Geneva: World Health.  
448 2017. [Google Scholar](#)
- 449 18. Agarwal M, Gunai S, Durmaz R, Yang Z. 2010. Integration of Mycobacterium  
450 tuberculosis drug susceptibility testing and genotyping with epidemiological data analysis to  
451 gain insight into the epidemiology of drug resistant tuberculosis in Malaya, Turkey. *J Clin*  
452 *Microbi* **48**:3301-3305.  
453
- 454 19. Pai M, Behr MA, Dowdy D, Dheda K, Divangahi M, Boehme CC, Ginsberg A,  
455 Swaminathan S, Spigelman M, Getahum H, Menzies D, Ravigilone M. 2016. Molecular  
456 Basis of Tuberculosis Pathogenesis. *Tuberculosis*; **2**:1-23.



- 457 20. Olusoji D, Osman E. 2011. Prevalence and risk factors associated with drug resistant TB  
458 in South West, Nigeria. *Asian Paci J Trop Med* **17**:148-151
- 459 21. Otu A, Umoh V, Habib A, Ameh S, Lawson L, Ansa V. 2013. Drug resistance among  
460 pulmonary tuberculosis patients in Calabar, Nigeria. *Pulmonary Medicine*; **2013**: 76-84.
- 461 22. Gaude GS, Hattiholli J, Kumar P. 2014. Risk factors and drug-resistance patterns among  
462 Pulmonary tuberculosis patients in Northern Karnataka region, India *Nig Med J* **55**: 327-332.
- 463 23. Shamaei M, Majid M, Ehsan C, Mehdi K, Mehdi E, Parisa F, Payam T, Majid V. A.  
464 2009. First-line anti-tuberculosis drug resistance patterns and trends at the national TB  
465 referral center in Iran—eight years of surveillance. *Elseveir* **56**:236-241.
- 466 24. Vashakldze L, Salakala A, Shubladze N, Cynamon M. 2009. Prevalence and risk factors  
467 for drug resistance among hospitalized pulmonary tuberculosis patients in Georgia. *Inter J*  
468 *Tuber and Lung dis* **13**:1148-1153
- 469 25. Lawson L, Habib AG, Okobi MI, Idiong D, Olajide I, Emenyonu N, Onuoha N, Cuevas  
470 LE, Ogiri SO. 2010. Pilot study on multidrug resistant tuberculosis in Nigeria. *Ann Afr Med*  
471 **9**:184-187
- 472 26. Eufrásio R. 2016. Pulmonary tuberculosis: Resistance pattern to first line anti-  
473 tuberculosis drugs in the Coimbra District, 2000-2011. *Portuguese J Pulmono* **116**:1-4
- 474 27. Lomtadze N, Aspindzelashvili R, Janjgava M, Mirtskhulava V, Wright A. 2009.  
475 Prevalence and risk factors for multidrug-resistant tuberculosis in the Republic of Georgia: a  
476 population based study. *Inter J Tuber and Lung Dis* **13**: 68-73

- 477 28. Kaona FAD, Mary T, Seter S, Lenganji S. 2004. An assessment of factors contributing to  
478 treatment adherence and knowledge of TB transmission among patients on TB treatment.  
479 *BMC Public Health* **4**:68-76
- 480 29. Li W, Zhang Y, Xing J, Ma Z, Qu Y, Li X. 2015. Factors associated with primary  
481 transmission of multidrug-resistant tuberculosis compared with healthy controls in Henan  
482 Province, China. *Infect Dis P* **4**:1-7
- 483 30. Medea G, Matthew JM, Russell RK, Lagor K, Tsira C, Jonathan EG, Henry MB. 2015.  
484 Tobacco smoking and tuberculosis treatment outcomes: a prospective cohort study in  
485 Georgia. *Bulletin of the World Health Organization* **93**:390-399
- 486 31. McGrath M, Geyvan PiHius NC, Van Helden PD, Warren RM, Warner DF. 2013  
487 Mutation rate and the emergence of drug resistance in *Mycobacterium tuberculosis*. *J Anti*  
488 *Chemo* **205**: 1-11.
- 489 32. Hamusse SD, Dejene T, Mohammed SH, Meaza D, Bernt L. 2016. Primary and  
490 secondary anti-tuberculosis drug resistance in Hitossa District of Arsi Zone, Oromia Regional  
491 State, Central Ethiopia. *BMC Public Health* **16**:593-563.
- 492 33. RangeN, Henrik F, Said M, Pascal M, John C, Andrew K, Apolinary M, Aase BA. 2012.  
493 Anti-tuberculosis drug resistance pattern among pulmonary tuberculosis patients with or  
494 without HIV infection in Mwanza, Tanzania. *Tanzania J Health Res* **14**:1-9
- 495 34. Lukoye D, Ssenooba W, Musisi K, Kasule GW, Cobelens FGJ, Joloba M, Gomez GB.  
496 2015. Variation and risk factors of drug resistant tuberculosis in Sub-Saharan African: a  
497 systematic review and meta-analysis. *BMC Public Health* **15**:1-13.

- 498 35. McBryde ES, Meehan IM, Doan TN, Ragonnet R, Marais JB Guernier V, Trauer JM.  
499 2017. The risk of global epidemic replacement with drug resistant *Mycobacterium*  
500 *tuberculosis* strains. *Inter J Infec Dise* **2856**:1-7.
- 501 36. Pourakbari B, Mamishi S, Mohammadzadeh M, Mahmoudi S. 2016. First-line Anti-  
502 Tubercular Drug Resistance of *Mycobacterium tuberculosis* in IRAN: A Systematic Review.  
503 *Fron Micro* **7**:1-11
- 504 37. Dasilva PEA, Palomino JC. 2011. Molecular Basis and mechanisms of drug resistance in  
505 *Mycobacterium tuberculosis*: classical and new drugs. *J Ant Chemo* **66**:1417-1430
- 506 38. Curry International Tuberculosis Center and California Department of Public Health,  
507 2016: Drug Resistant Tuberculosis: A Survival Guide for Clinicians. Third Edition 31-56
- 508
- 509
- 510
- 511
- 512
- 513
- 514
- 515
- 516
- 517
- 518
